# Supplementary material for: Lability classification of soil organic matter in the northern permafrost region
Source: Copernicus journal article supplement (doi:10.5194/bg-17-361-2020), 2020-01-23

Supplement of Biogeosciences, 17, 361–379, 2020  
<https://doi.org/10.5194/bg-17-361-2020-supplement>  
© Author(s) 2020. This work is distributed under  
the Creative Commons Attribution 4.0 License.

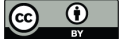

*Supplement of*

## **Lability classification of soil organic matter in the northern permafrost region**

**Peter Kuhry et al.**

*Correspondence to:* Peter Kuhry ([peter.kuhry@natgeo.su.se](mailto:peter.kuhry@natgeo.su.se))

The copyright of individual parts of the supplement might differ from the CC BY 4.0 License.

# 1 Lability classification of soil organic matter in the northern permafrost region

2 Kuhry et al., Supplement

3

4 **Table S1.** Overview of field study areas and incubated samples.

| Study area     | Geographic location         | Approximate coordinates | Permafrost zone | Vegetation zone                   | Mean Annual/July Temperatures | Nr profiles / incubated soil samples | Partner and incubation experiment | Time of soil sampling |
|----------------|-----------------------------|-------------------------|-----------------|-----------------------------------|-------------------------------|--------------------------------------|-----------------------------------|-----------------------|
| Ny Ålesund     | Svalbard                    | 78.9 N, 11.7 E          | Continuous      | Tundra                            | -5.8/+5.2                     | 16 / 24                              | UCOP_PAGE21                       | Summer 2013           |
| Adventdalen    | Svalbard                    | 78.2 N, 15.9 E          | Continuous      | Tundra                            | -6.0/+6.2                     | 35 / 79                              | UCOP_PAGE21                       | Summer 2013           |
| Lena Delta     | N Siberia                   | 72.3 N, 126.3 E         | Continuous      | Tundra                            | -12.5/+10.1                   | 43 / 122                             | UCOP_PAGE21                       | Summer 2013           |
| Logata         | Taymyr Peninsula, N Siberia | 73.4 N, 98.4 E          | Continuous      | Tundra                            | -14.3/+11.2                   | 33 / 218                             | USB_CryoCarb <sub>2</sub>         | Summer 2011           |
| Shalaurovo     | Lower Kolyma, NE Siberia    | 69.5 N, 161.7 E         | Continuous      | Tundra                            | -12.1/+11.7                   | 22 / 290                             | USB_CryoCarb <sub>1</sub>         | Summer 2010           |
| Arymas         | Taymyr Peninsula, N Siberia | 72.5 N, 101.7 E         | Continuous      | Tundra, Forest Islands            | -13.3/+12.2                   | 34 / 294                             | USB_CryoCarb <sub>2</sub>         | Summer 2011           |
| Cherskiy       | Lower Kolyma, NE Siberia    | 68.8 N, 161.6 E         | Continuous      | Forest (-Tundra), Lowland, Alpine | -11.1/+12.7                   | 16 / 207                             | USB_CryoCarb <sub>1</sub>         | Summer 2010           |
| Seida          | NW Russia                   | 67.1 N, 62.9 E          | Discontinuous   | Tundra, Forest Islands            | -6.1/+13.0                    | 8 / 80                               | USB_CryoCarb <sub>3</sub>         | Summer 2008           |
| Stordalen Mire | Abisko, N Sweden            | 68.3 N, 19.1 E          | Sporadic        | Alpine treeline ecotone           | -0.2/+11.6                    | 5 / 13                               | UCOP_PAGE21                       | Summer 2013           |

5

6

7 **Table S2.** Representation of landscape classes in each incubation experiment and its study area(s).

| Study area     | Geographic location         | Incubation experiment | Peat deposit | Peaty wetland deposit | Mineral soil, mountains | Mineral soil, lowlands | Soils in alluvial deposit | Soils in eolian deposit | Mineral soil, deeper C-enriched | Pleistocene Yedoma deposit |
|----------------|-----------------------------|-----------------------|--------------|-----------------------|-------------------------|------------------------|---------------------------|-------------------------|---------------------------------|----------------------------|
| Ny Ålesund     | Svalbard                    | PAGE21                |              |                       | Y                       | Y                      | Y                         |                         |                                 |                            |
| Adventdalen    | Svalbard                    | PAGE21                |              | Y                     | Y                       | Y                      | Y                         | Y                       | Y                               |                            |
| Lena Delta     | N Siberia                   | PAGE21                |              |                       |                         | Y                      | Y                         | Y                       | Y                               |                            |
| Stordalen Mire | Abisko, N Sweden            | PAGE21                | Y            |                       |                         |                        |                           |                         |                                 |                            |
| Shalauovo      | Lower Kolyma, NE Siberia    | CryoCarb 1            | Y            | Y                     |                         | Y                      | Y                         | Y                       | Y                               | Y                          |
| Cherskiy       | Lower Kolyma, NE Siberia    | CryoCarb 1            | Y            | Y                     | Y                       | Y                      | Y                         | Y                       | Y                               | Y                          |
| Logata         | Taymyr Peninsula, N Siberia | CryoCarb 2            |              | Y                     |                         | Y                      | Y                         |                         |                                 |                            |
| Arymas         | Taymyr Peninsula, N Siberia | CryoCarb 2            | Y            | Y                     |                         | Y                      | Y                         |                         |                                 |                            |
| Seida          | NW Russia                   | CryoCarb 3            | Y            | Y                     |                         | Y                      |                           |                         |                                 |                            |

8

9

**Figure S1.** Cross correlations between geochemical parameters for all samples in the four incubation experiments: a-c, PAGE21; d-f, CryoCarb 1-Kolyma; g-i, CryoCarb 2-Taymyr; j-l, CryoCarb 3-Seida. All regressions significant ( $p < 0.05$ ).

a

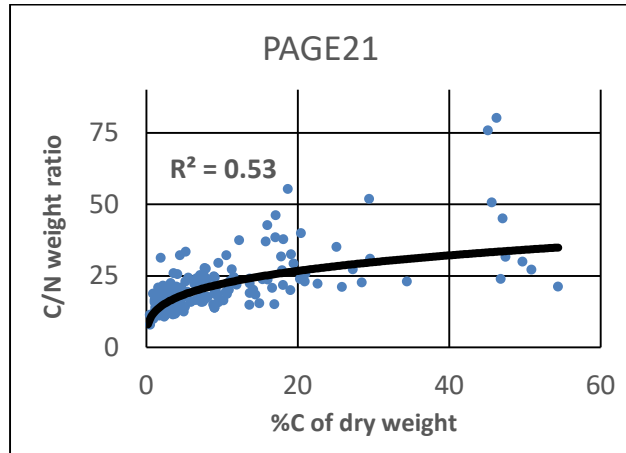

b

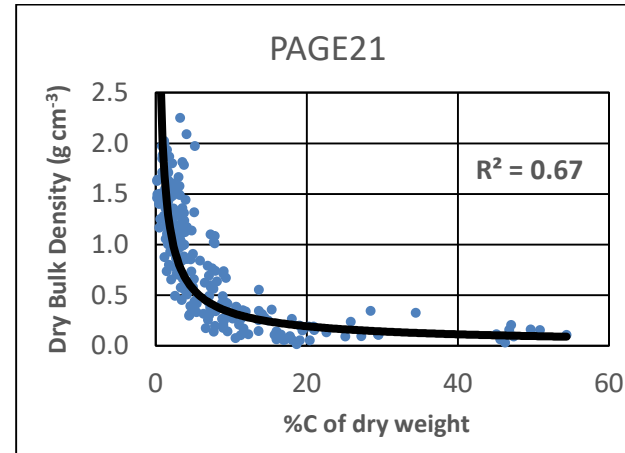

c

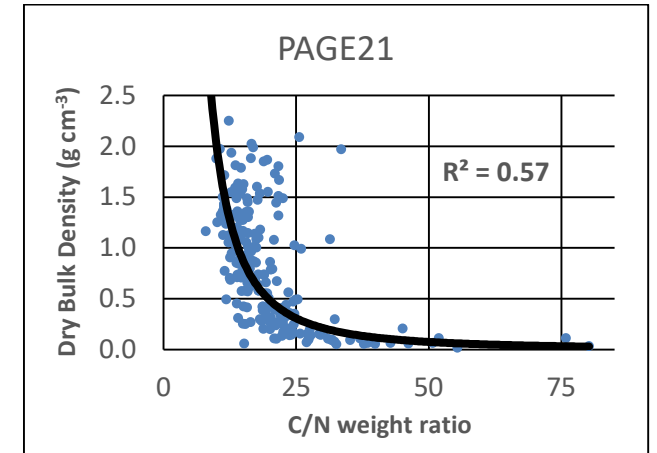

d

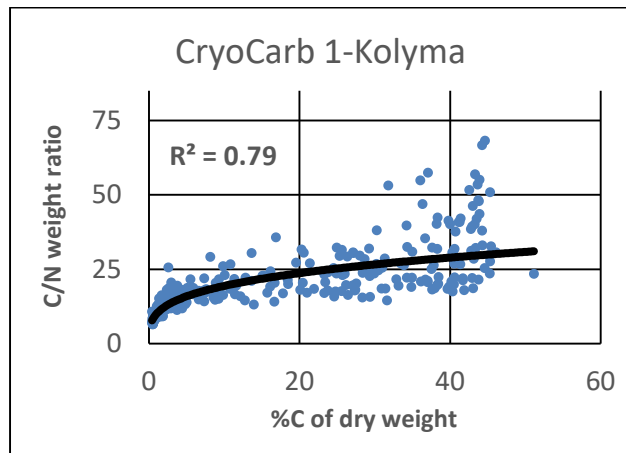

e

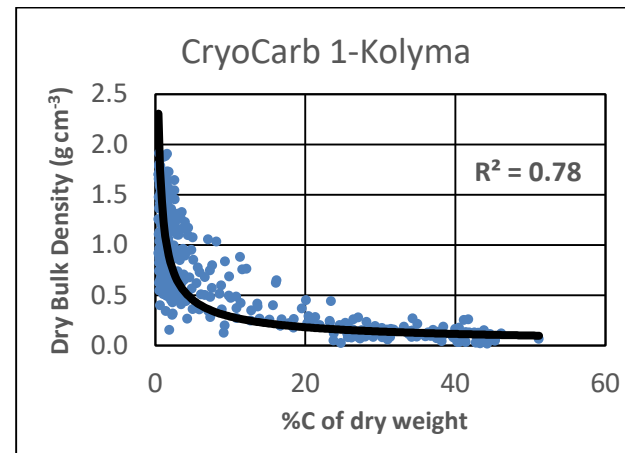

f

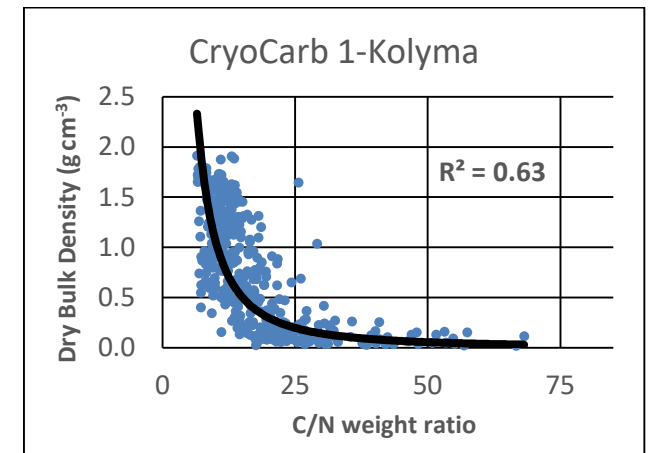

Figure S1, cont'd.

g

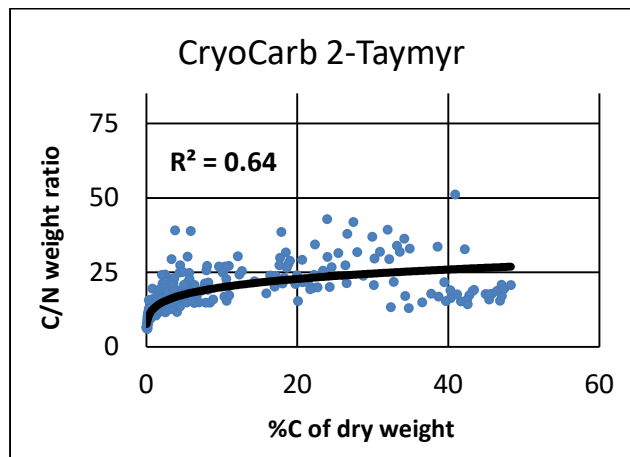

h

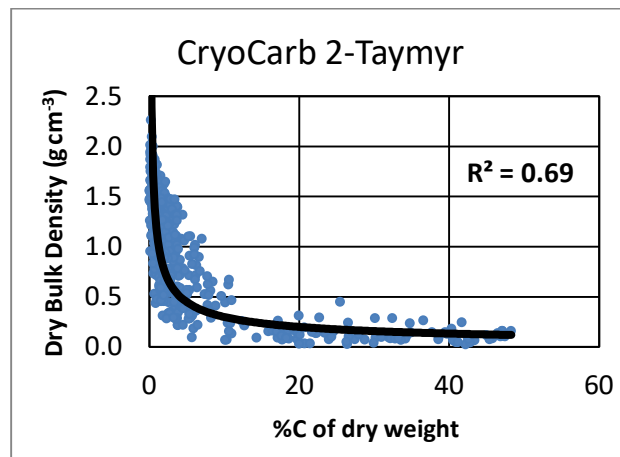

i

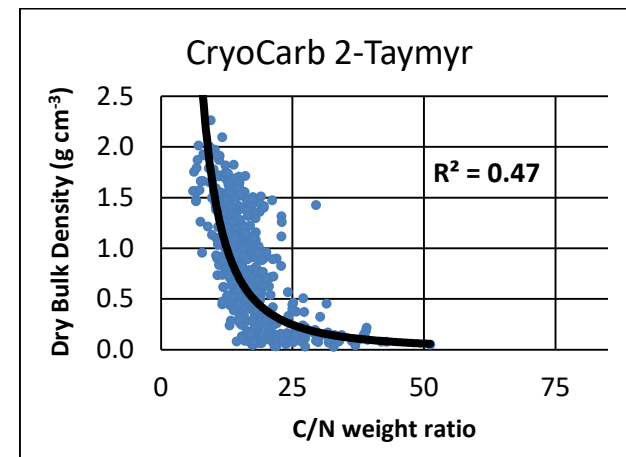

j

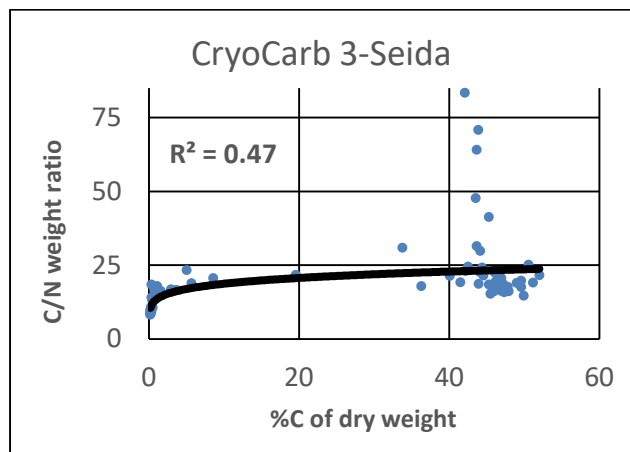

k

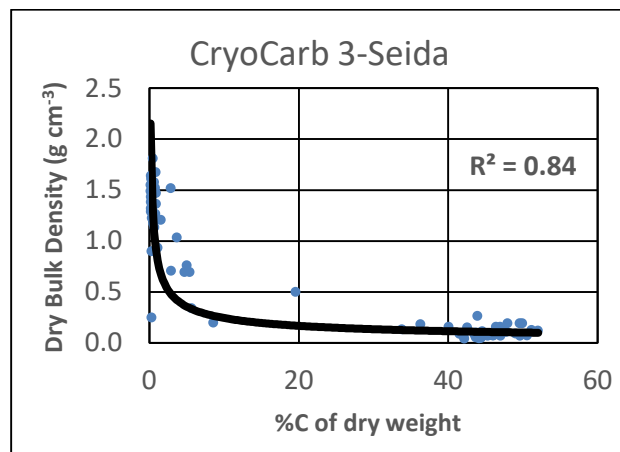

l

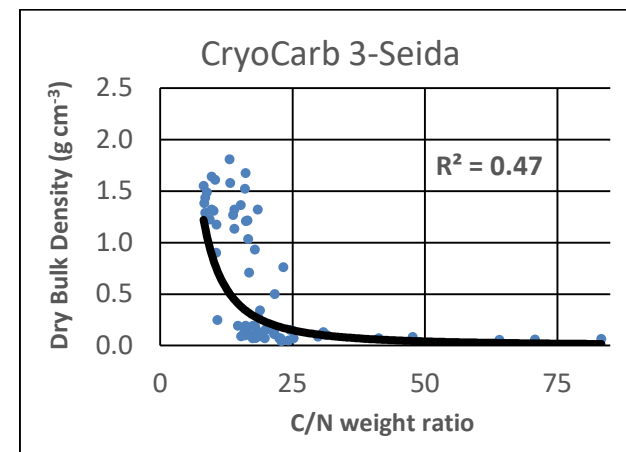

**Figure S2.** Correlations between geochemical parameters and  $\mu\text{gC-CO}_2$  production per gram dry weight (gdw) for all samples in the four incubation experiments: a-c, PAGE21; d-f, CryoCarb 1-Kolyma; g-i, CryoCarb 2-Taymyr; j-l, CryoCarb 3-Seida. All regressions significant ( $p < 0.05$ ).

a

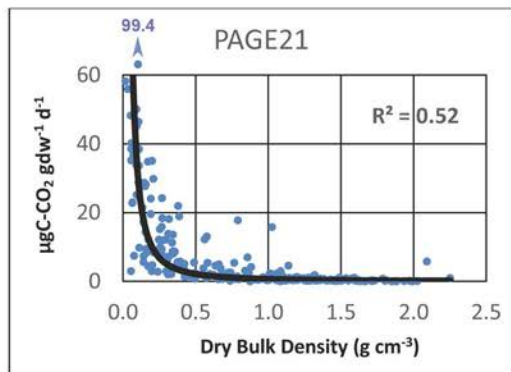

b

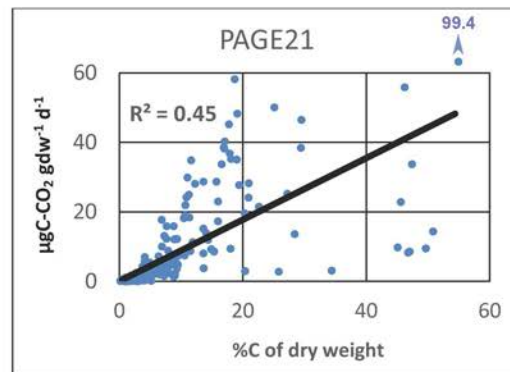

c

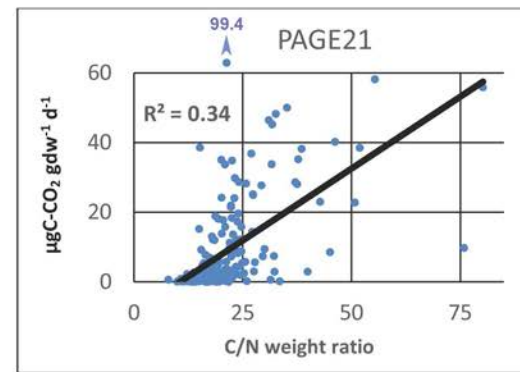

d

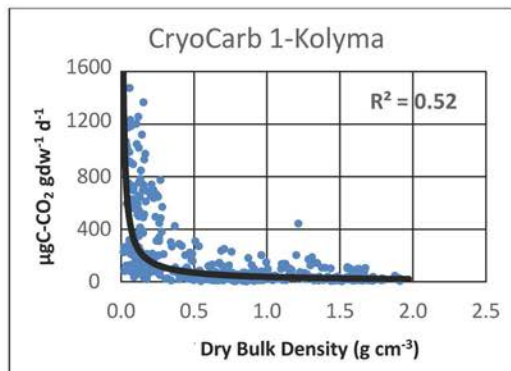

e

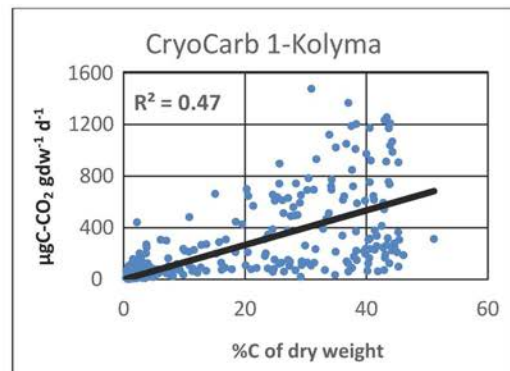

f

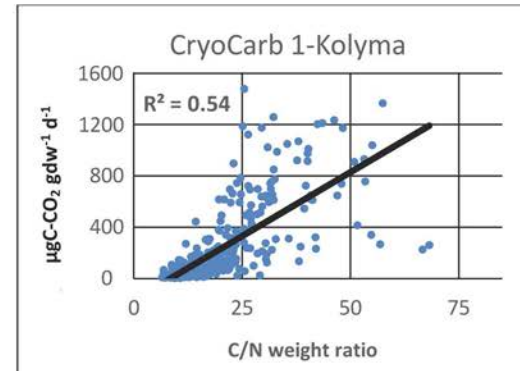

Figure S2, cont'd.

g

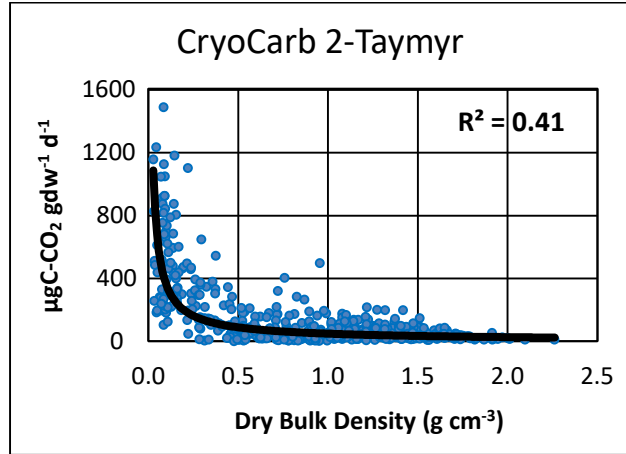

h

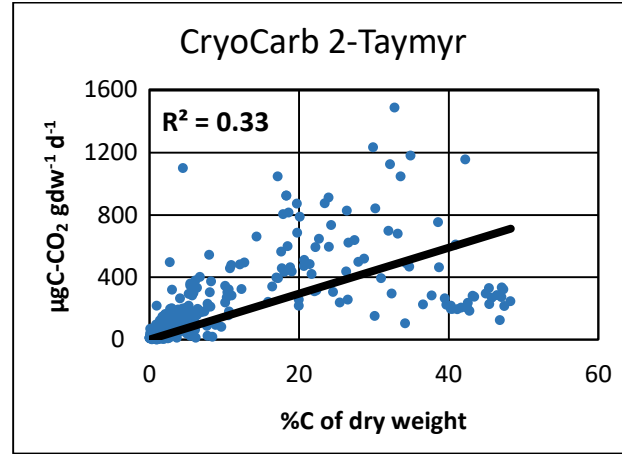

i

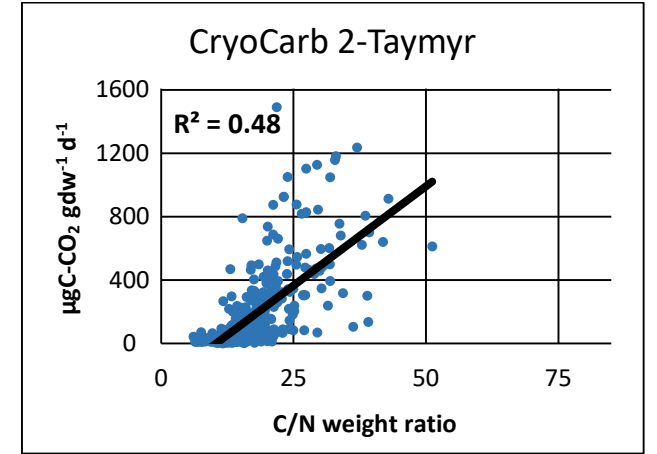

j

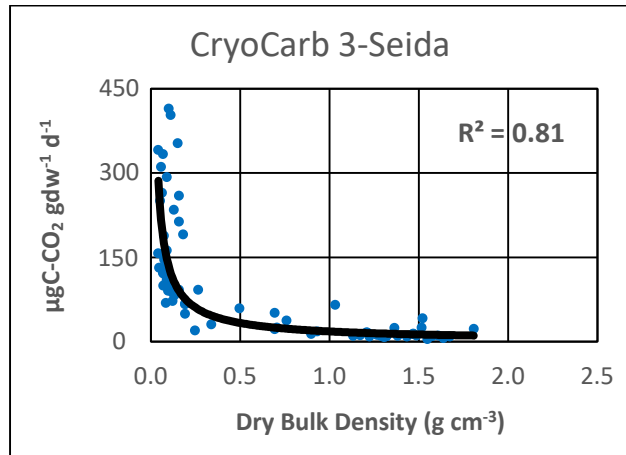

k

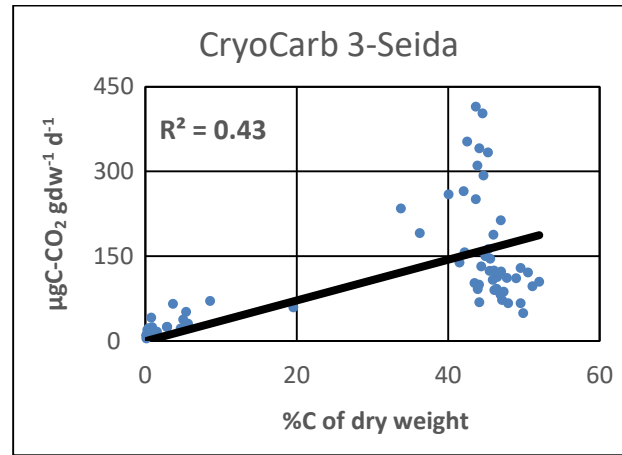

l

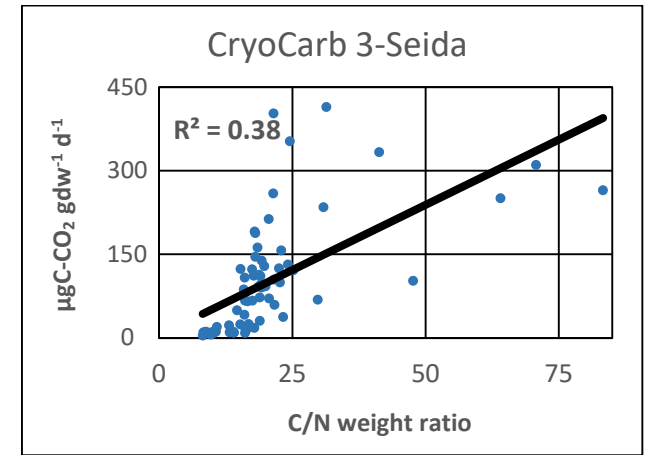

**Figure S3.**  $\mu\text{gC-CO}_2$  production per gram dry weight as a function of %C of the sample for the different landscape unit classes in the CryoCarb 2-Taymyr (a, top panel) and CryoCarb 3-Seida (b, lower panel) incubation experiments: Alluvial class (red line and diamonds, CryoCarb 2-Taymyr experiment only); Mineral class (brown line and squares); Peaty wetland class (light green line and circles); Peatland class (dark green line and circles). All regressions significant ( $p < 0.05$ ), except for peat deposits in the CryoCarb 2-Taymyr dataset (n.s.).

a

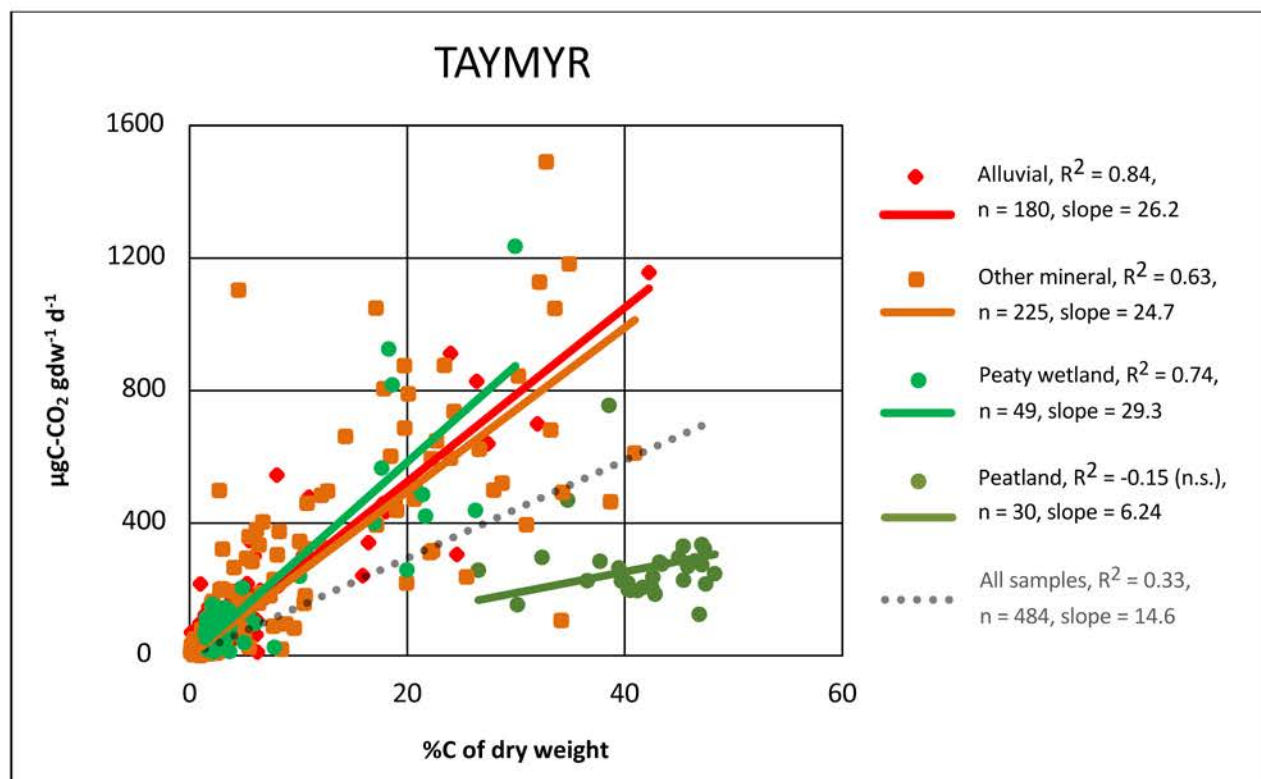

b

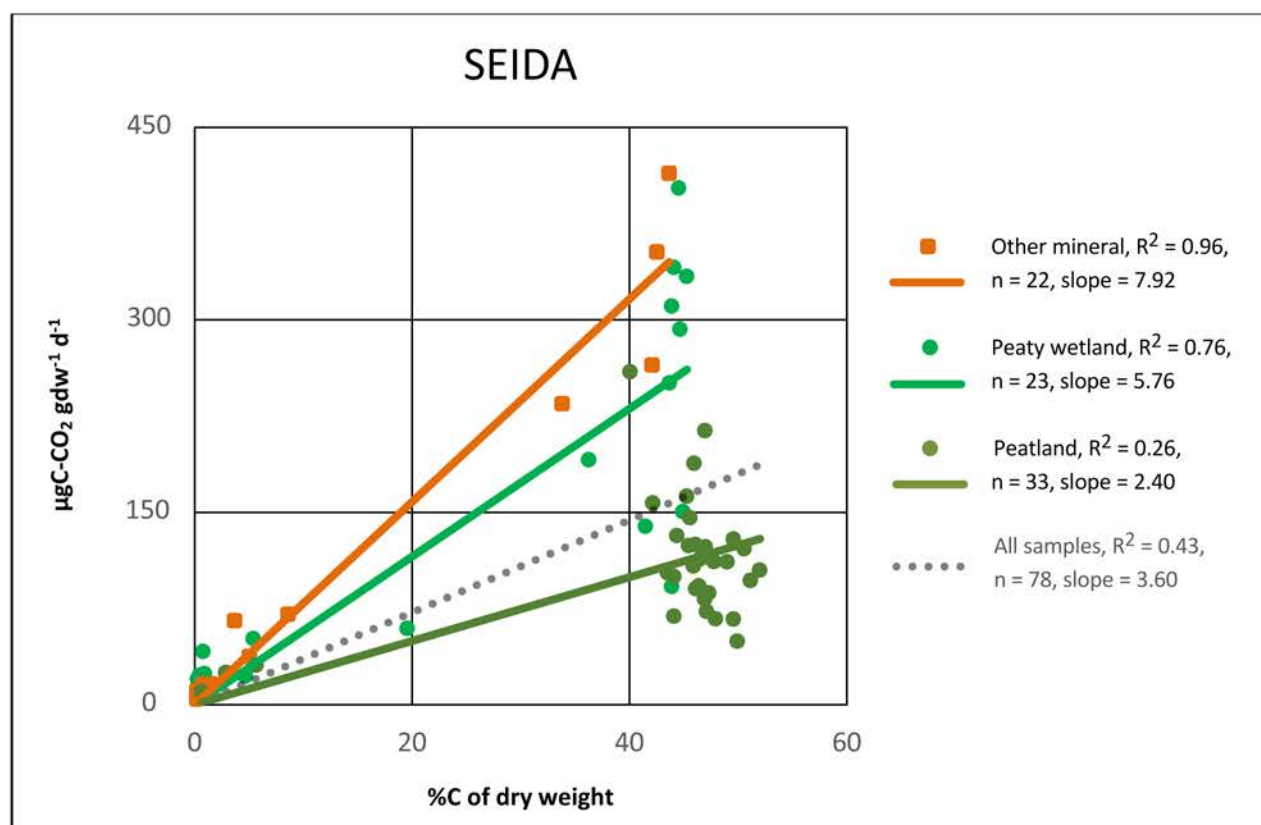



**Figure S4.**  $\mu\text{gC-CO}_2$  production per gram dry weight as a function of C/N of the sample for the different landscape unit classes in the PAGE21 (a, top panel left), CryoCarb 1-Kolyma (b, lower panel left), CryoCarb 2-Taymyr (c, top panel right) and CryoCarb 3-Seida (d, lower panel right) incubation experiments: Alluvial class (red line and diamonds); Eolian class (blue line and triangles); Mineral class (brown line and squares); Peaty wetland class (dark green line and circles); Peatland class (light green line and circles). All regressions linear fits, except for peat deposits in the PAGE21 dataset and peat deposits in the CryoCarb 1-Kolyma (power fits). All regressions significant ( $p < 0.05$ ), except for peaty wetland and peat deposits in the PAGE21 dataset and peat deposits in the CryoCarb 1-Kolyma and CryoCarb 3-Seida datasets (n.s.). Note that not all landscape unit classes are represented in all four incubation experiments.

a. PAGE21

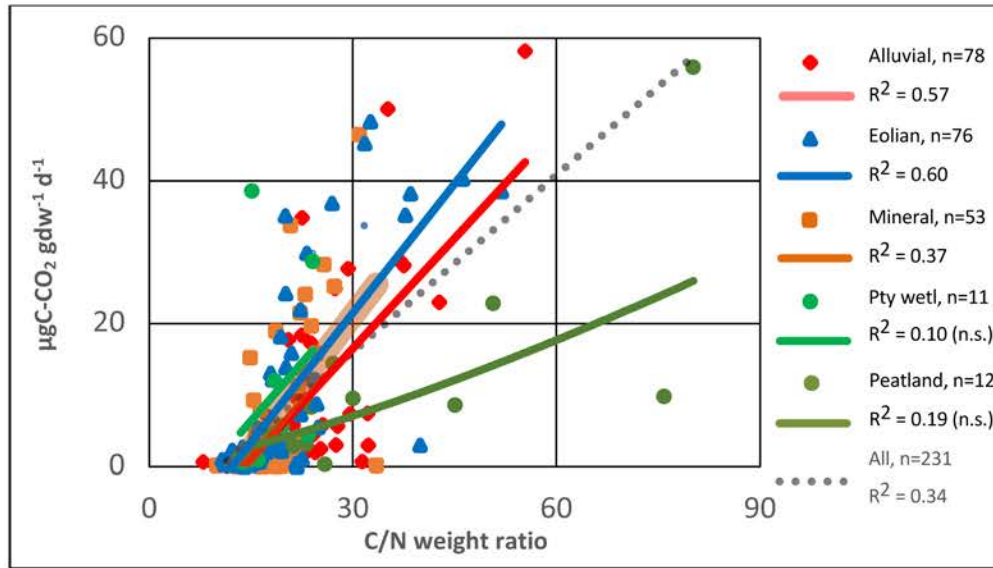

c. CryoCarb 2-Taymyr

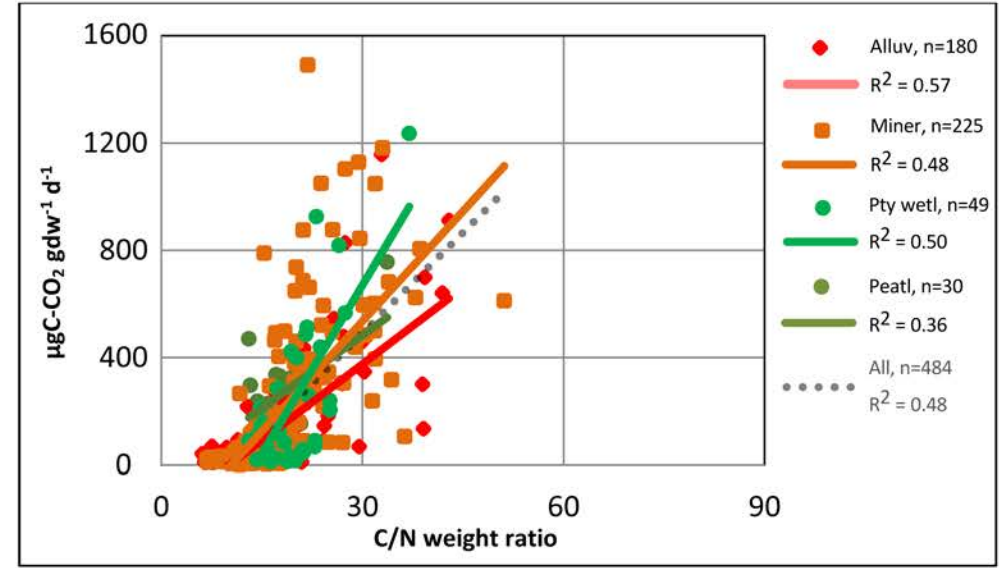

b. CryoCarb 1-Kolyma

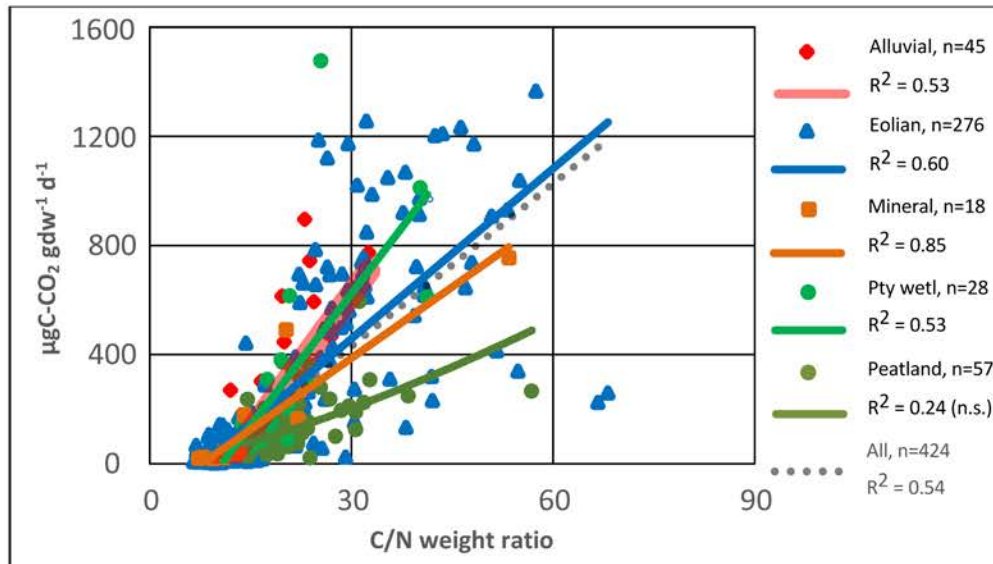

d. CryoCarb 3-Seida

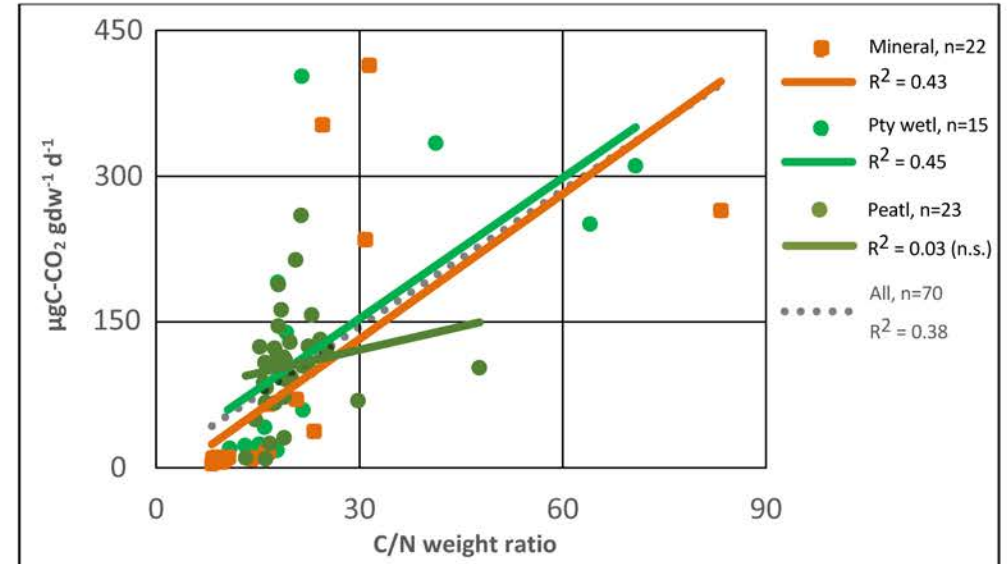

**Figure S5.** a)  $\mu\text{gC-CO}_2$  production per gram carbon as a function of %C of the sample and b)  $\mu\text{gC-CO}_2$  production per  $\text{cm}^3$  as a function of %C of the sample, for the different landscape classes in the PAGE21 dataset: Alluvial class (red line and diamonds); Eolian class (blue line and triangles); Mineral class (brown line and squares); Peaty wetland class (dark green line and circles); Peatland class (light green line and circles). Non-significant regressions ( $p > 0.05$ ), are marked n.s.

a

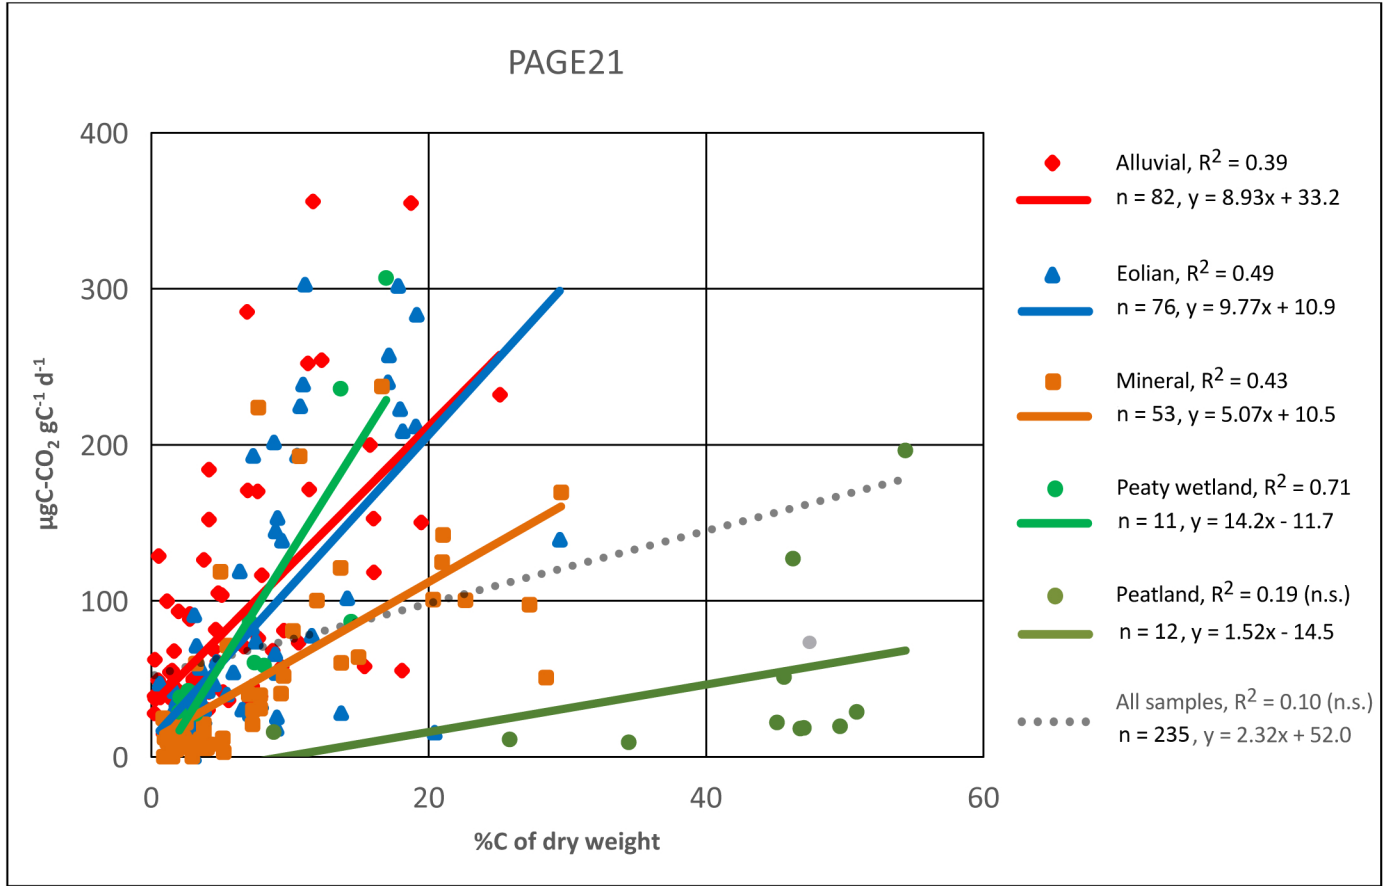

b

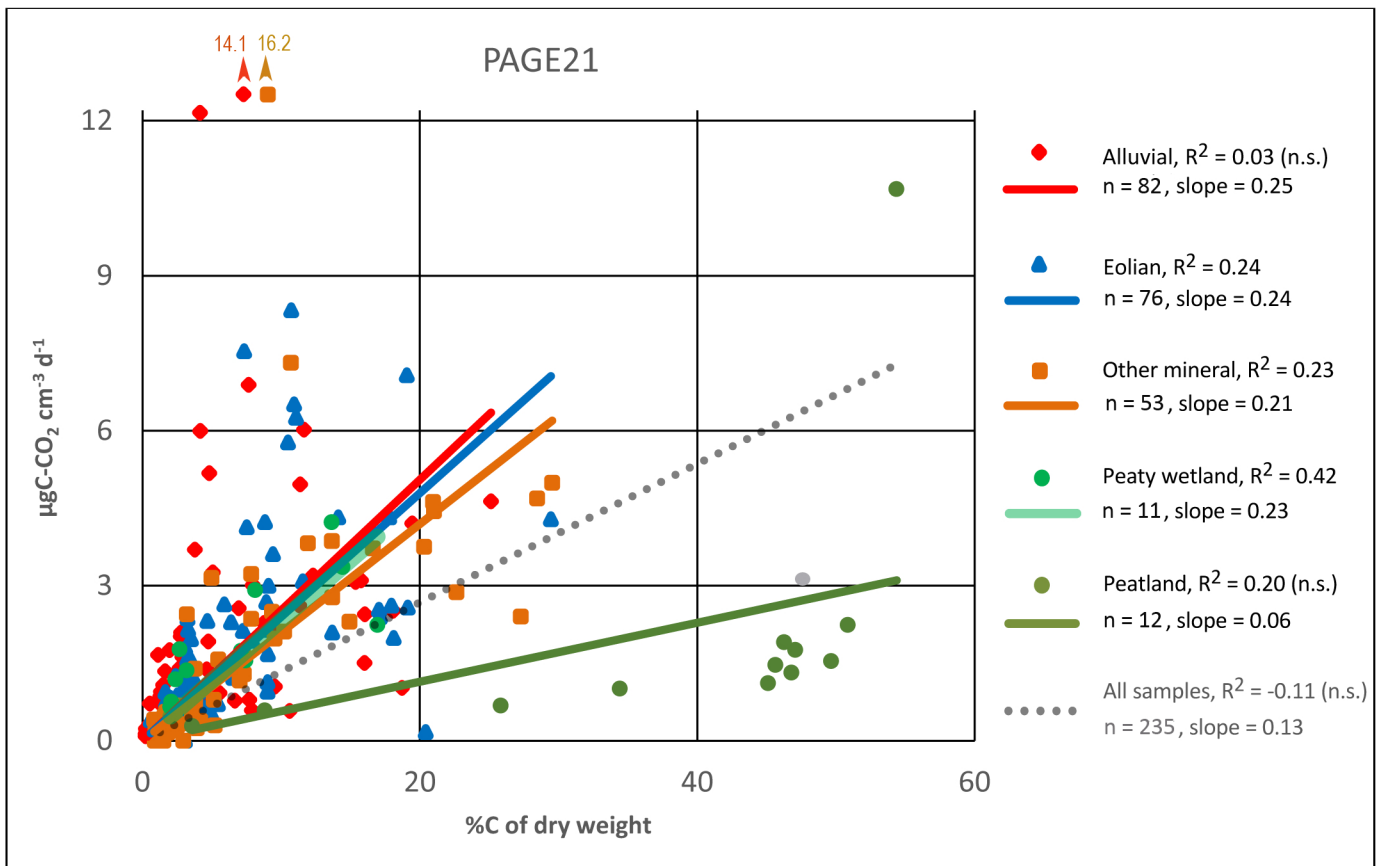

1 **Figure S6.** C content (as %C of dry weight) in samples of (a) the PAGE21 and (b) the CryoCarb 1-Kolyma incubation  
 2 experiments, grouped according to soil horizon criteria. Abbreviations: AL-OL = Active layer topsoil organics; AL-Min  
 3 = Active layer mineral; AL-Ce = Active layer C-enriched; P-Min = Permafrost layer mineral; P-Ce = Permafrost layer  
 4 C-enriched; AL-Pty = Active layer thin peat (CryoCarb 1-Kolyma experiment only); AL-Pt = Active layer peat; P-Pt =  
 5 Permafrost layer peat (CryoCarb 1-Kolyma experiment only); AL-Lss OL = Active layer topsoil organics in Late  
 6 Holocene loess deposits (PAGE21 experiment only); AL-Lss Min = Active layer mineral in Late Holocene loess  
 7 deposits (PAGE21 experiment only); P-Lss Min = Permafrost layer mineral in Late Holocene loess deposits (PAGE21  
 8 experiment only); P-Yed = Permafrost Pleistocene Yedoma deposits (CryoCarb 1-Kolyma experiment only); Fr-Yed =  
 9 Thawed out Pleistocene Yedoma deposits (CryoCarb 1-Kolyma experiment only). Box-whisker plots show mean and  
 10 standard deviation (in red) and median, first and third quartiles and min/max values (in black), for the different soil  
 11 horizon groups.

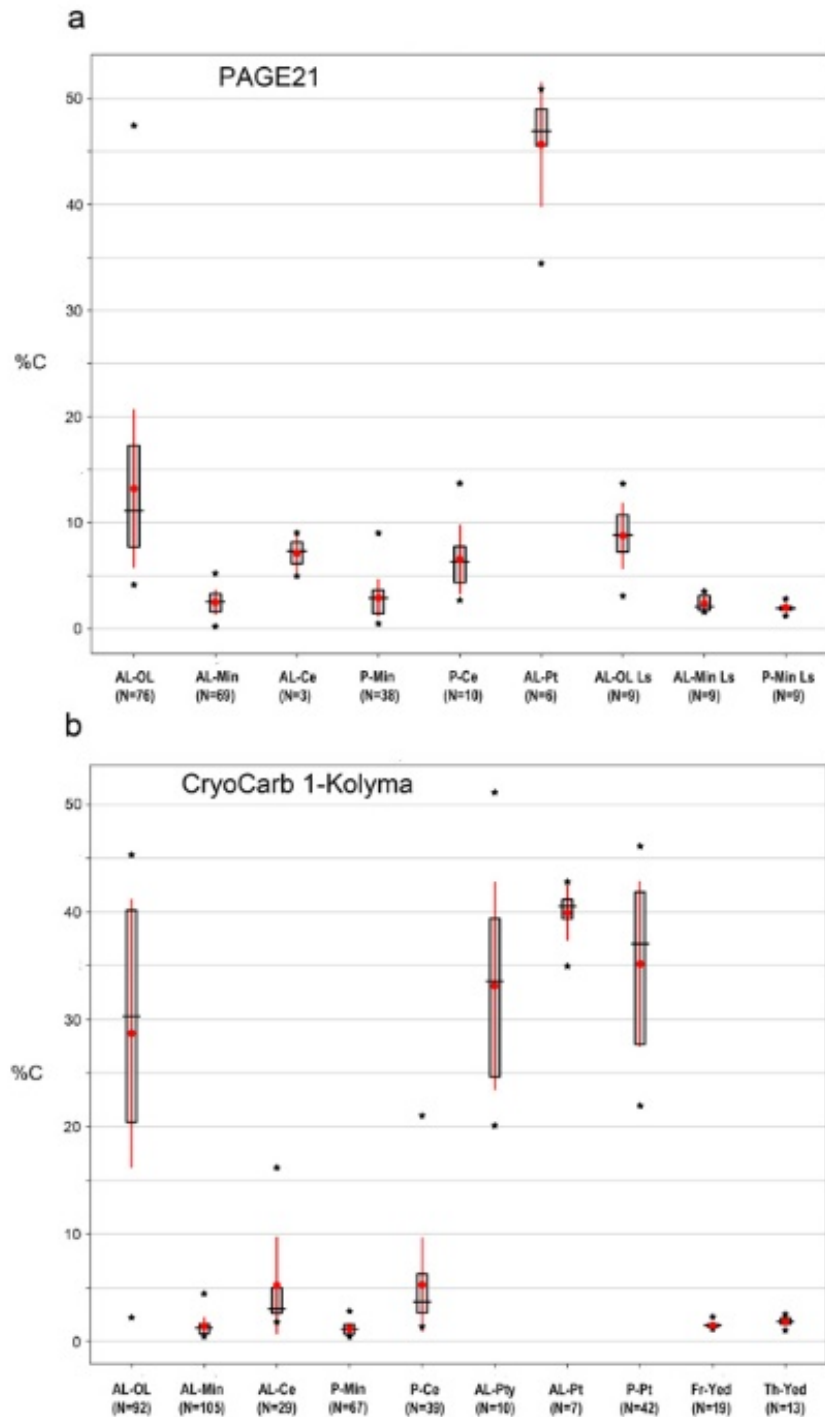

Supplement: Supplementary file 1 [file bg-17-361-2020-supplement.pdf]
